# Supplementary material for: A novel coumarin, (+)-3′-angeloxyloxy-4′-keto-3′,4′-dihydroseselin, isolated from Bupleurum malconense (Chaihu) inhibited NF-κB activity
Source: Springer Nature journal article supplement (doi:10.1186/s13020-016-0077-x), 2016-02-13

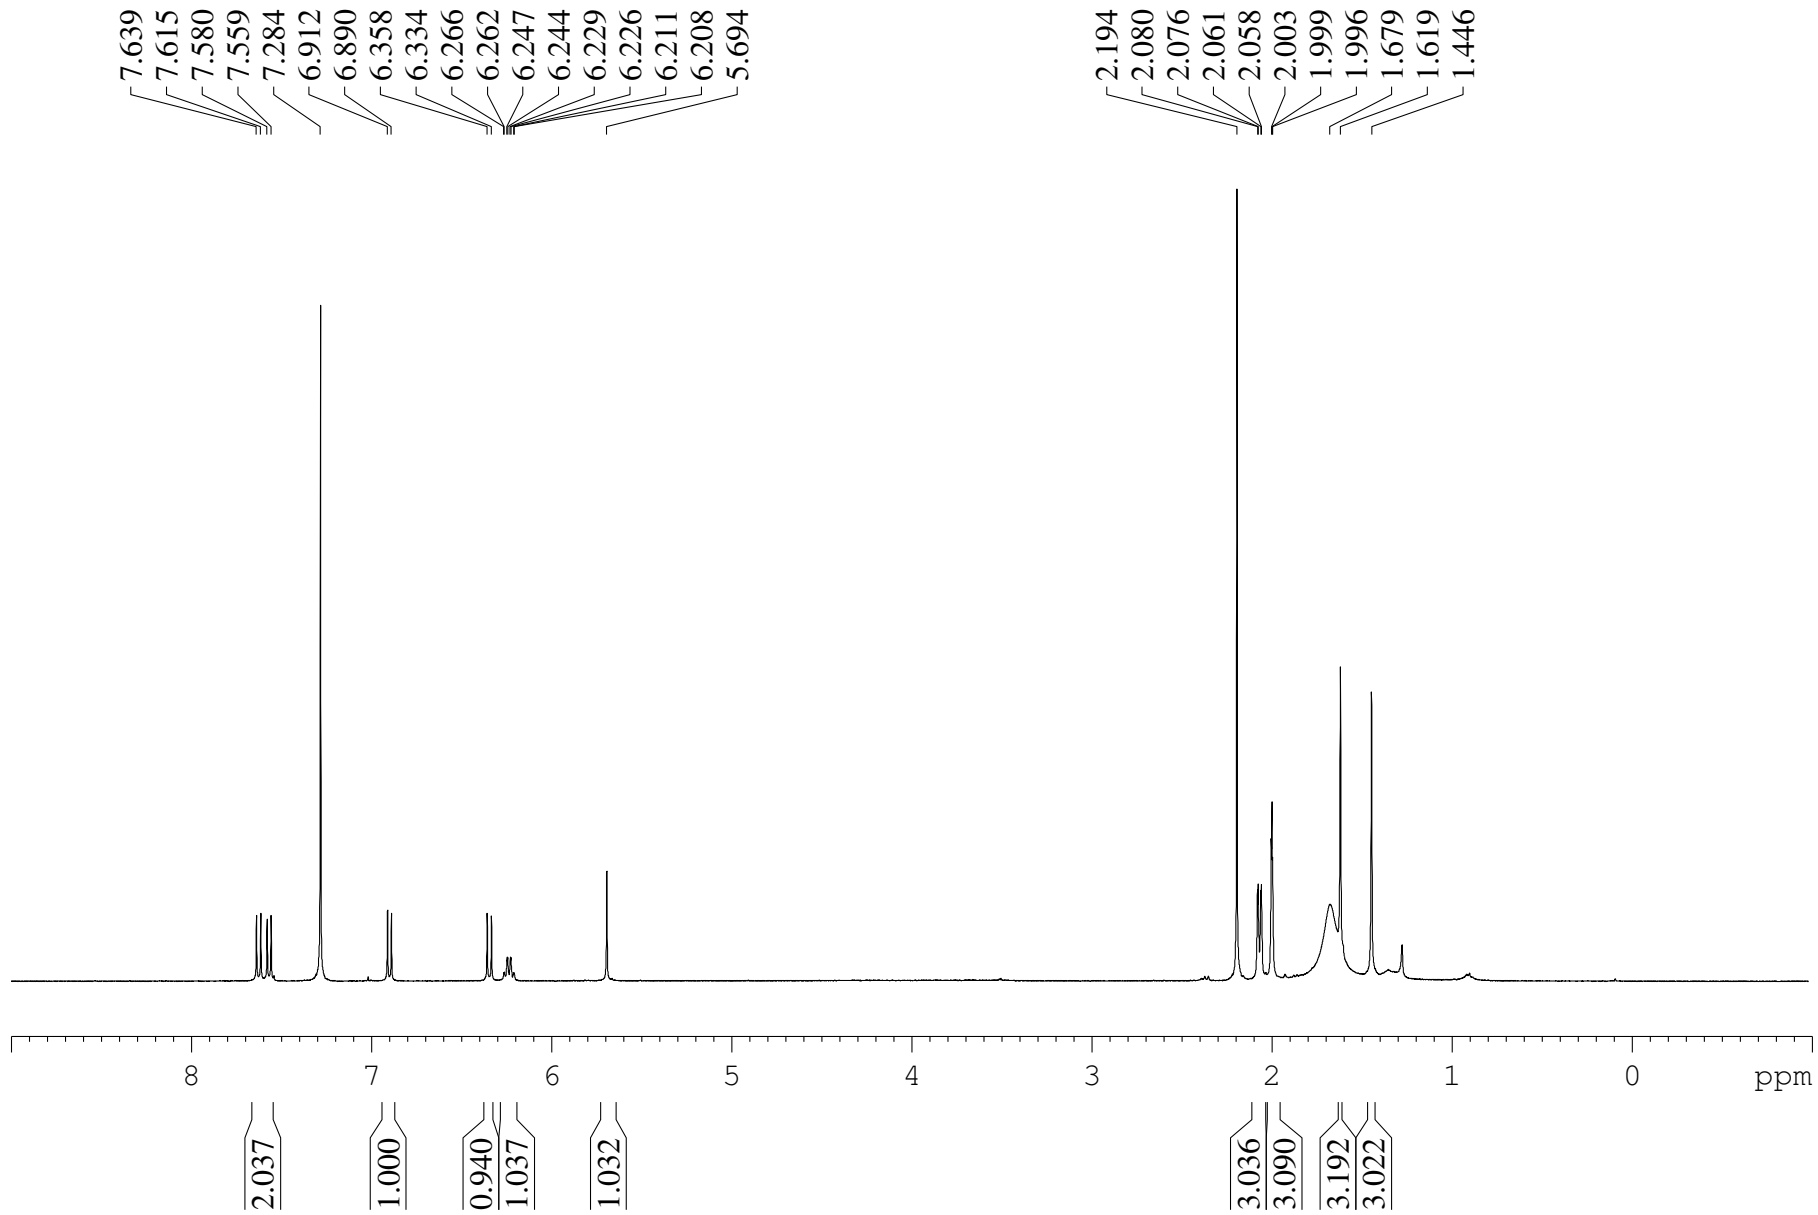

Supplement: MOESM4 [file 9775716]
